# Supplementary material for: Hollow mesoporous SiO2 sphere nanoarchitectures with encapsulated silver nanoparticles for catalytic reduction of 4-nitrophenol
Source: Royal Society of Chemistry journal article supplement (doi:10.1039/c6qi00002a), 2016-01-01
Supplement: c6qi00002a1.pdf [file c6qi00002a1.pdf]

## Electronic Supplementary Information

### Hollow Mesoporous SiO<sub>2</sub> Spheres Catalyst Nanoarchitecture with Encapsulated Silver Nanoparticles for Catalytic Reduction of 4- nitrophenol

Weiqliang Li,<sup>a,&</sup> Xiao Ge,<sup>a,b,&</sup> Hao Zhang,<sup>a</sup> Qianqian Ding,<sup>a</sup> Hualin Ding,<sup>a</sup> Yunxia Zhang,<sup>a\*</sup> Guozhong Wang,<sup>a</sup> Haimin Zhang,<sup>a</sup> and Huijun Zhao<sup>a,c\*</sup>

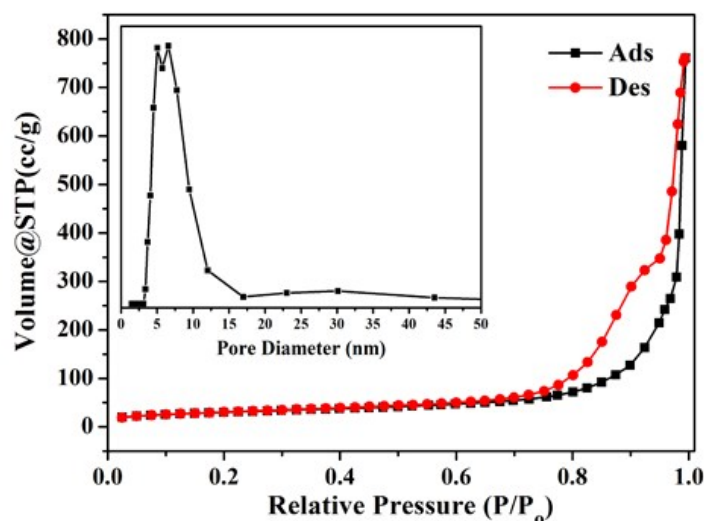

**Fig. S1** N<sub>2</sub> adsorption/desorption isotherm of the as-prepared *hm*-SiO<sub>2</sub> spheres using C<sub>18</sub>TMS as the structural-directing agent. The inset shows the pore size distribution calculated by the Barrett-Joyner-Halenda (BJH) method from the desorption branch of the isotherm.

<sup>a</sup> Key Laboratory of Materials Physics, Centre for Environmental and Energy Nanomaterials, Anhui Key Laboratory of Nanomaterials and Nanotechnology, Institute of Solid State Physics, Chinese Academy of Sciences, Hefei 230031, China. Email: [yxzhang@issp.ac.cn](mailto:yxzhang@issp.ac.cn).

<sup>b</sup> University of Science and Technology of China, Hefei 230026, P. R. China.

<sup>c</sup> Centre for Clean Environment and Energy, Gold Coast Campus, Griffith University, Queensland 4222, Australia. E-mail: [h.zhao@griffith.edu.au](mailto:h.zhao@griffith.edu.au)

<sup>&</sup> These authors contributed equally to this work.

† Footnotes relating to the title and/or authors should appear here.

Electronic Supplementary Information (ESI) available: N<sub>2</sub> adsorption/desorption isotherm of the as-prepared *hm*-SiO<sub>2</sub> spheres; SEM image and EDS analysis of the deposition of AgI NPs on *hm*-SiO<sub>2</sub> spheres outer surfaces; Ag NP numbers in an individual Ag@*hm*-SiO<sub>2</sub> sphere; N<sub>2</sub> adsorption/desorption isotherm of the Ag@*hm*-SiO<sub>2</sub> spheres before and after laser ablation treatment. See DOI: 10.1039/x0xx00000x

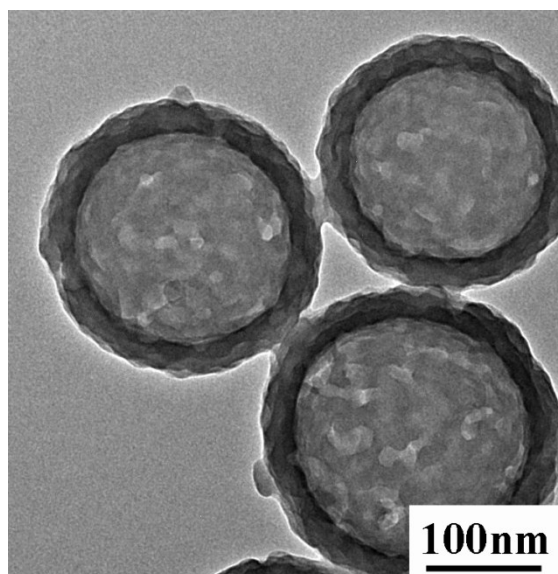

**Fig. S2** TEM image of the partial nearly nonporous hollow silica spheres.

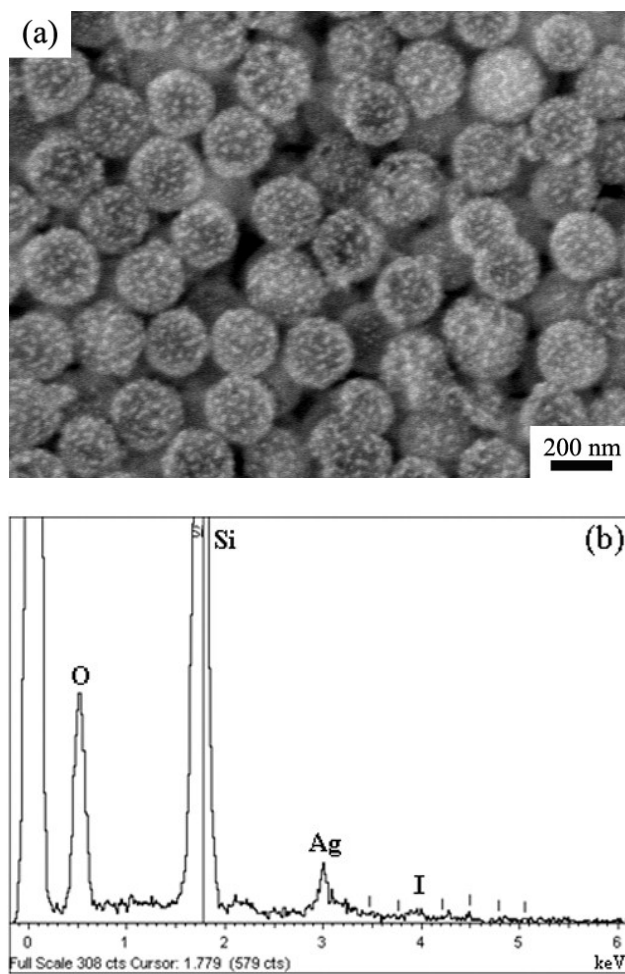

**Fig. S3** (a) SEM image and (b) EDS analysis of the deposition of AgI NPs on *hm*-SiO<sub>2</sub> spheres outer surfaces.

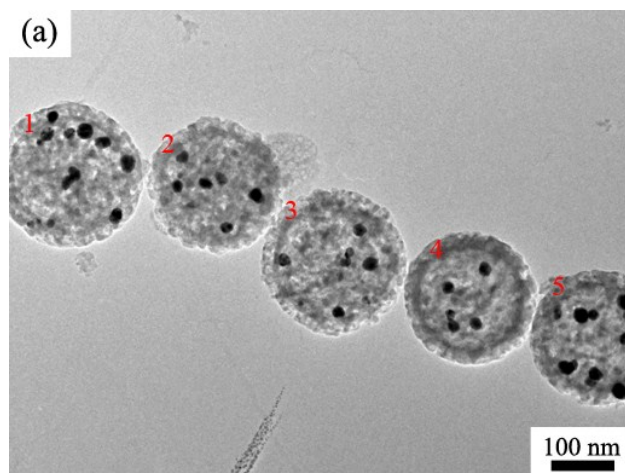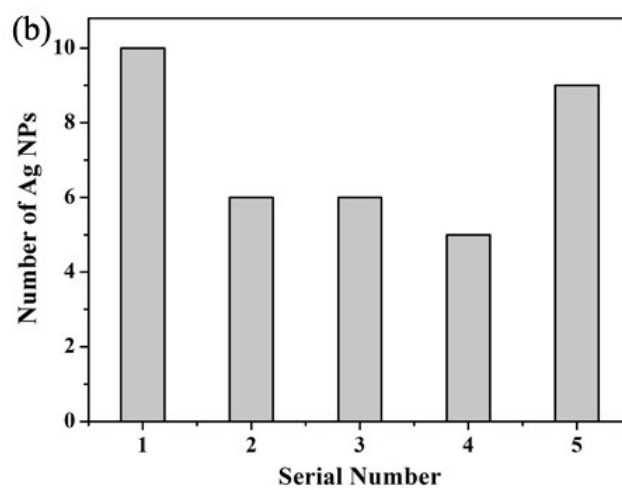

**Fig. S4** (a) TEM image and (b) the corresponding Ag NP numbers in an individual  $\text{Ag}@hm\text{-SiO}_2$  sphere as marked numbers.

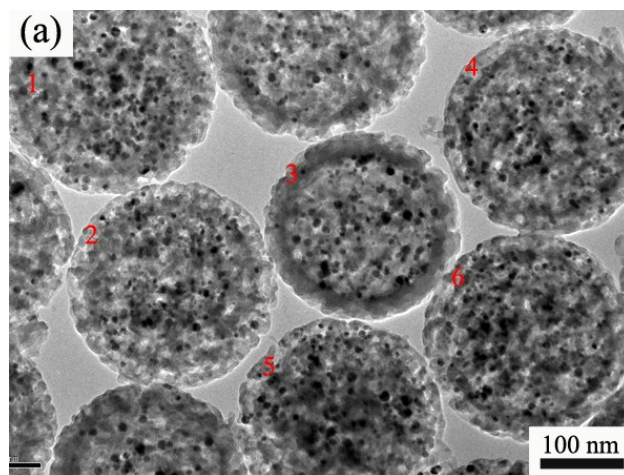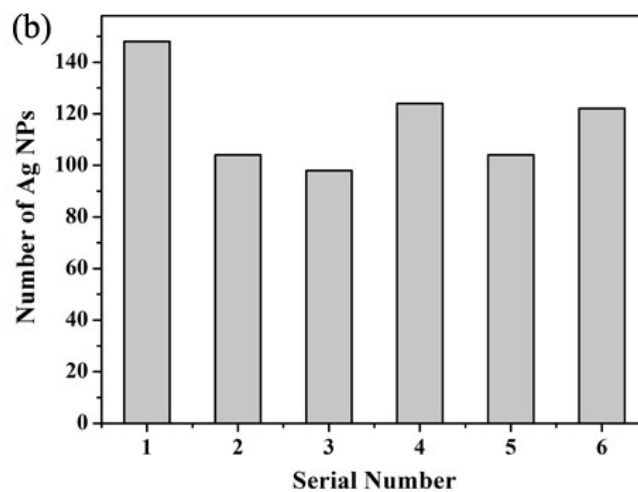

**Fig. S5** (a) TEM image and (b) the corresponding number of Ag NPs in an individual Ag@hm-SiO<sub>2</sub> sphere as marked numbers.

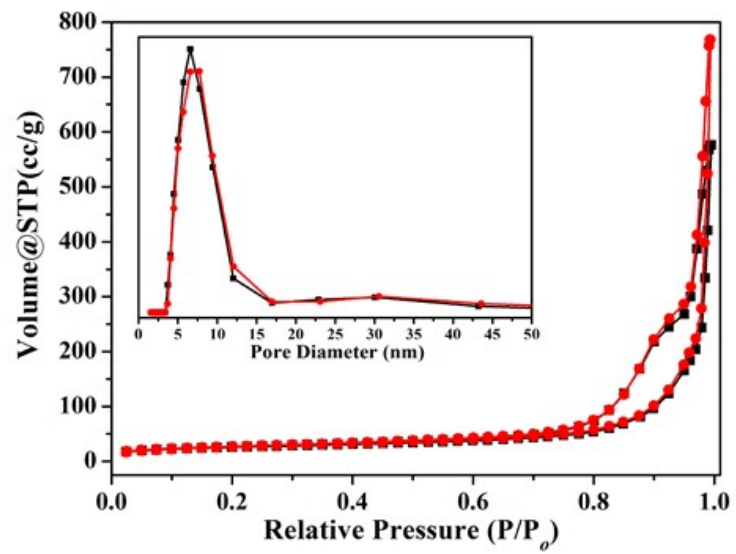

**Fig. S6** N<sub>2</sub> adsorption/desorption isotherm of the Ag@hm-SiO<sub>2</sub> spheres before (■) and after (●) laser ablation treatment; the inset showing the corresponding pore size distribution.

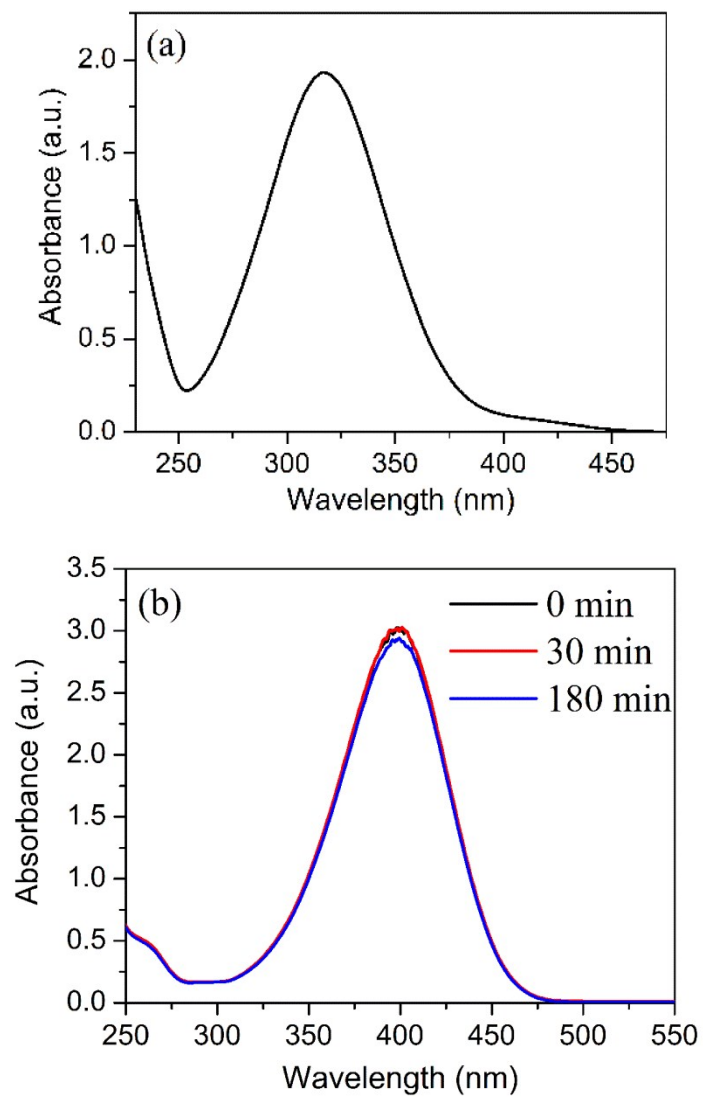

**Fig. S7** UV-Vis spectra: (a) the pristine 4-NP aqueous solution; (b) 4-NP solution with NaBH<sub>4</sub> in the absence of any catalyst.

**Table. S1** The rate constants of 4-NP reduced by different catalysts

| Catalyst                                                | Rate constants [ $k$ , min <sup>-1</sup> ] | References                 |
|---------------------------------------------------------|--------------------------------------------|----------------------------|
| Au@SiO <sub>2</sub> -epoxide                            | 0.3                                        | A. K. Ganai <sup>25a</sup> |
| Pd@TiO <sub>2</sub> /Pd@TiO <sub>2</sub>                | 0.307                                      | B. C. Liu <sup>25b</sup>   |
| SiO <sub>2</sub> @RGO@AgNP                              | 0.7                                        | W. Xiao <sup>25c</sup>     |
| MCM-41 supported Ag nanocomposite                       | 0.26                                       | N. J. Hao <sup>25d</sup>   |
| Ag/0.5CeO <sub>2</sub> -SBA-15                          | 0.41                                       | X. F. Qian <sup>25e</sup>  |
| Ag-PCL                                                  | 0.32                                       | L. L. Shi <sup>4a</sup>    |
| Ag-tipped Au nanorods                                   | 0.324                                      | X. Guo <sup>25f</sup>      |
| Au@mSiO <sub>2</sub> micelle                            | 0.108                                      | Q. Zhang <sup>25g</sup>    |
| Au-POMA hollow hybrids with Au                          | 0.38                                       | J. Han <sup>25h</sup>      |
| PDA@Fe <sub>3</sub> O <sub>4</sub> @Au@SiO <sub>2</sub> | 0.38                                       | L. Huang <sup>25i</sup>    |
| YS-Au@Ph-PMOs                                           | 0.3                                        | H. B. Zou <sup>25j</sup>   |
| Ag@ <i>hm</i> -SiO <sub>2</sub>                         | 1.08                                       | This Work                  |
